# Supplementary material for: Whole-exome sequencing identifies protein-coding variants associated with brain iron in 29,828 individuals
Source: PubMed Central journal article supplement (PMC11219919; doi:10.1038/s41467-024-49702-2), 2024-07-02
Supplement: 41467_2024_49702_MOESM1_ESM.pdf [file 41467_2024_49702_MOESM1_ESM.pdf]

# Supplementary Material for “Whole-Exome Sequencing Identifies Protein-Coding Variants Associated with Brain Iron in 29,828 Individuals”

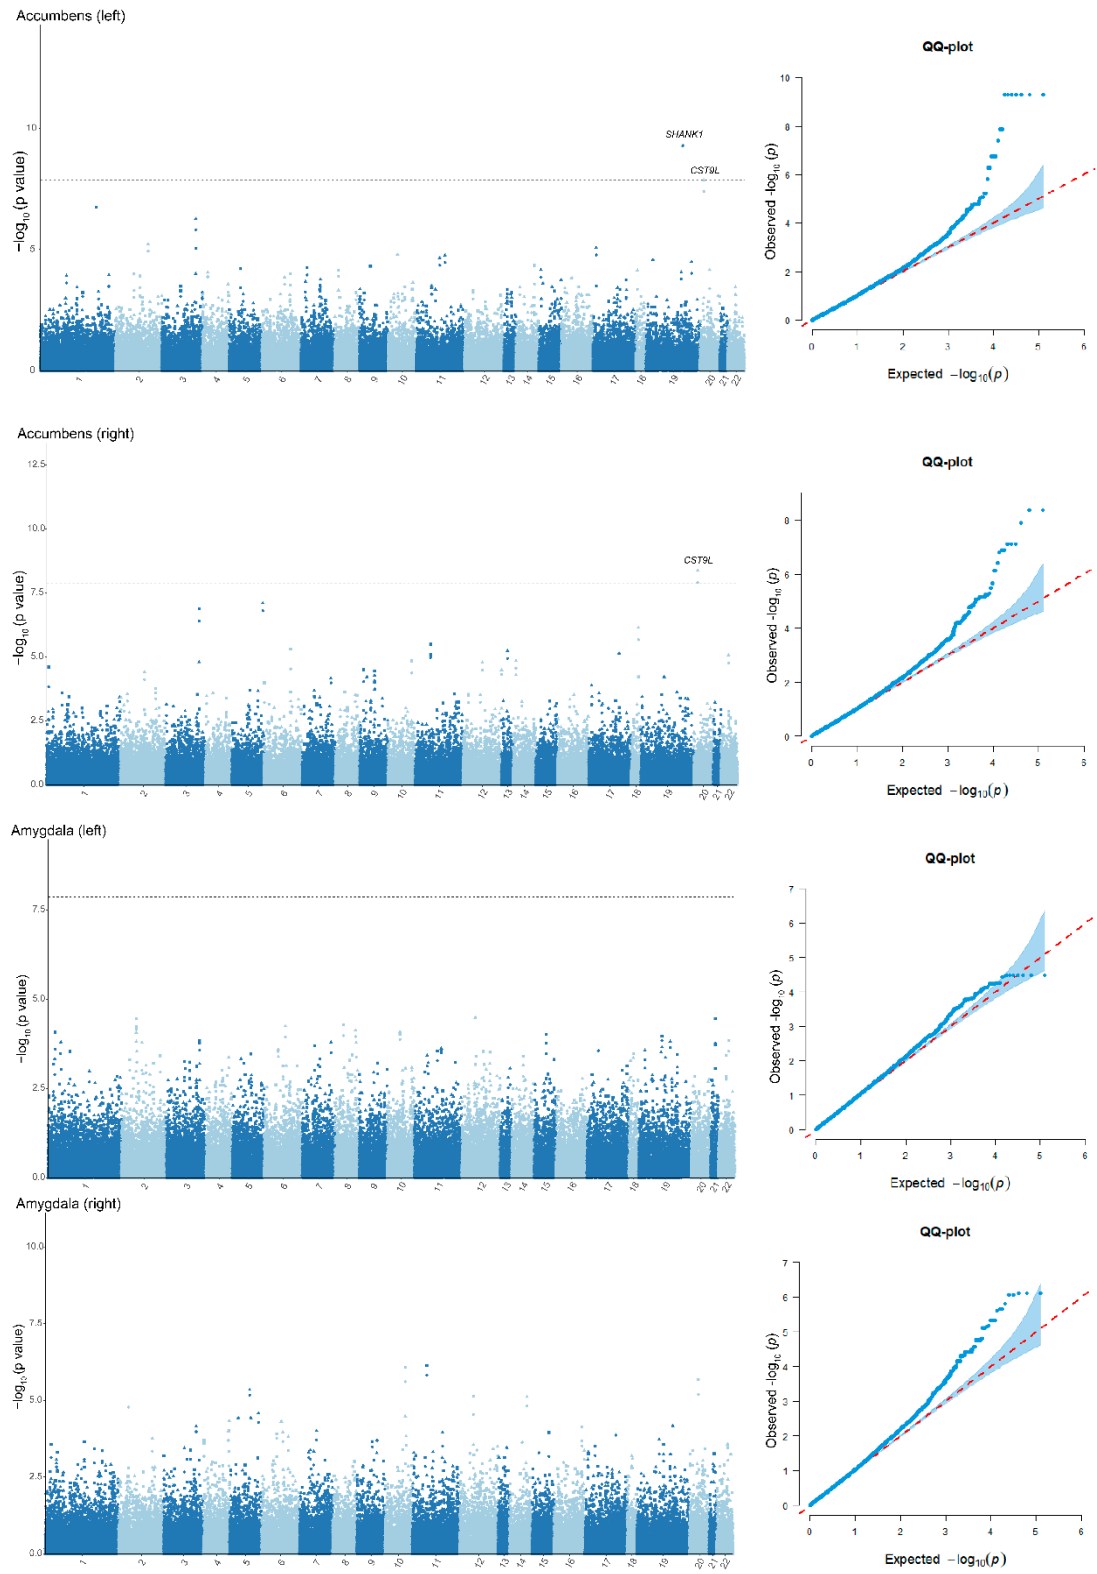

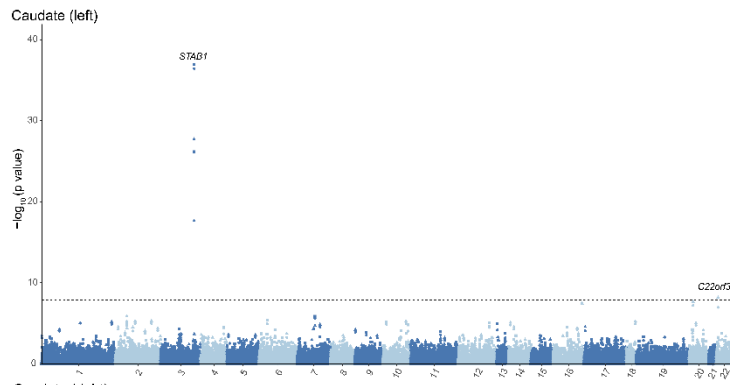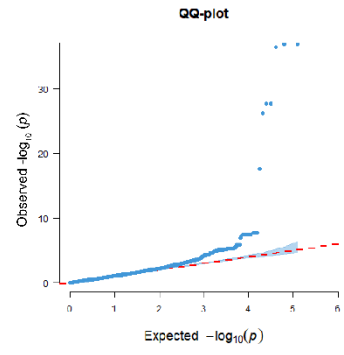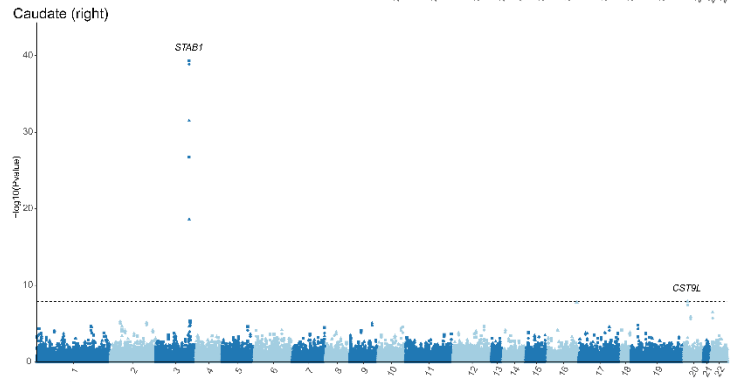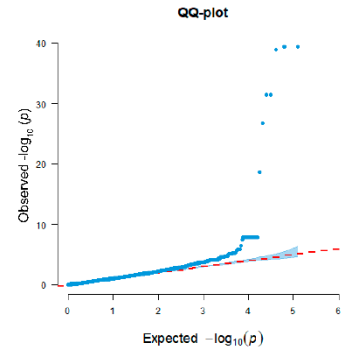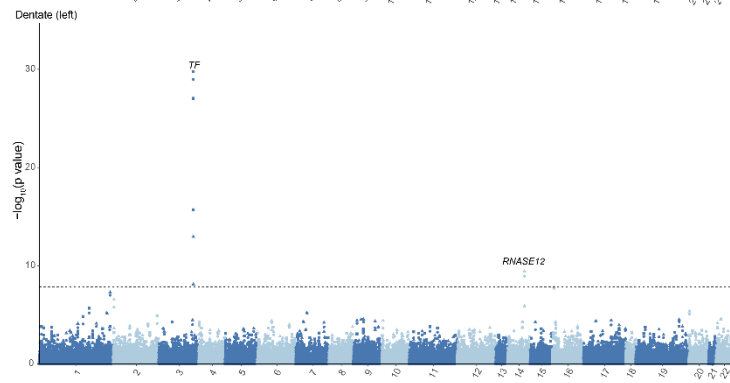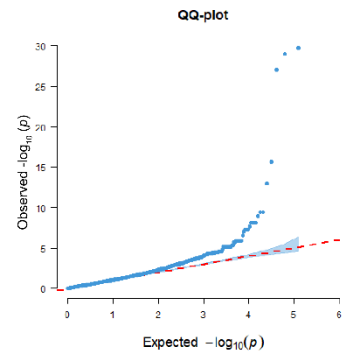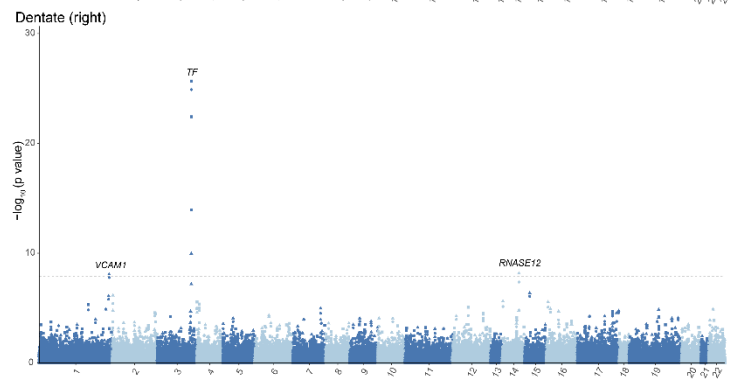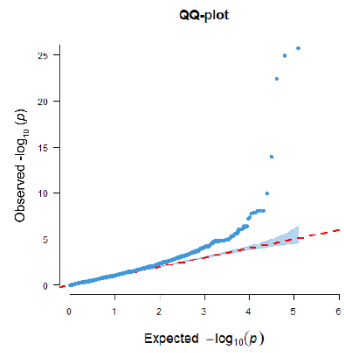

Globus pallidus externa (left)

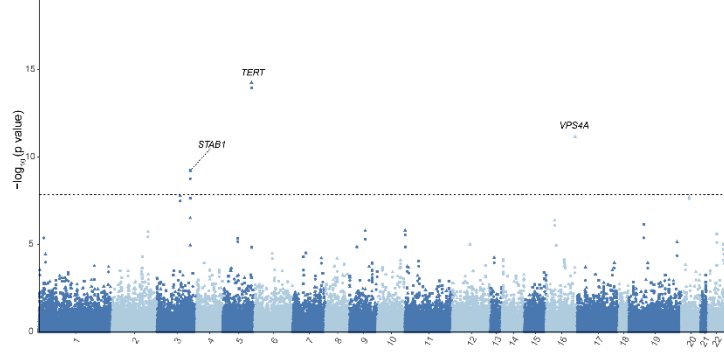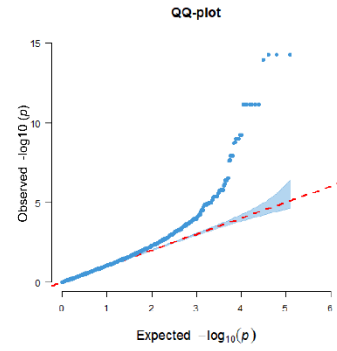

Globus pallidus externa (right)

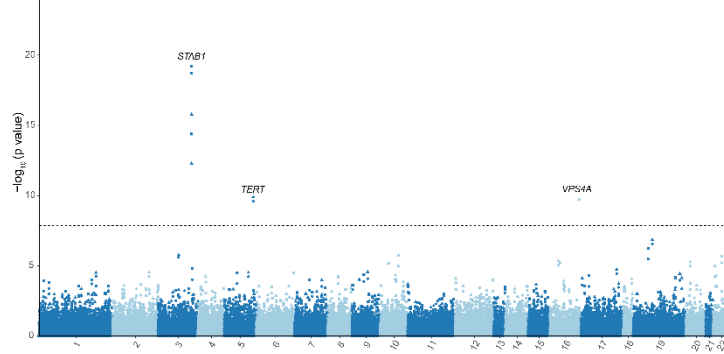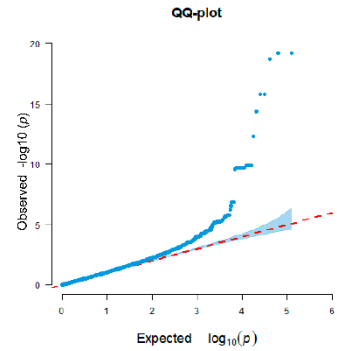

Globus pallidus interna (left)

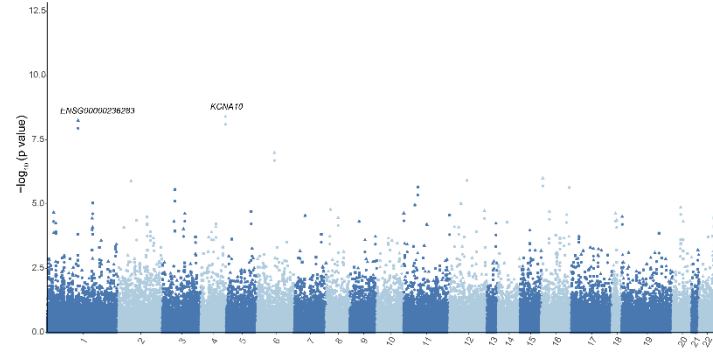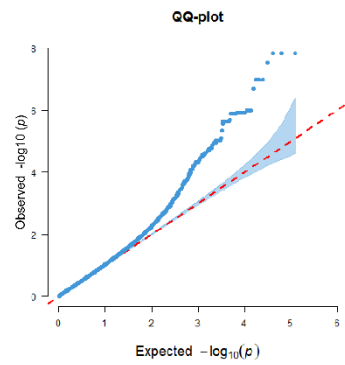

Globus pallidus interna (right)

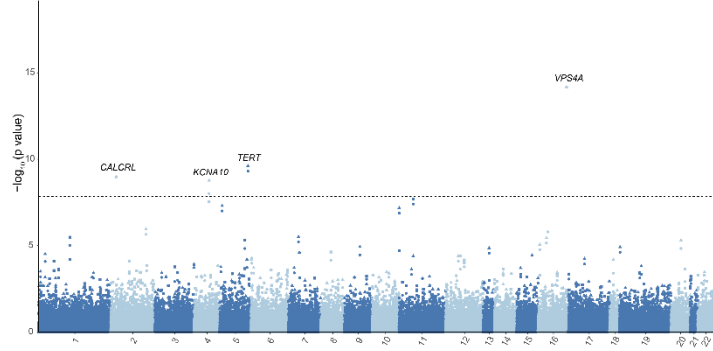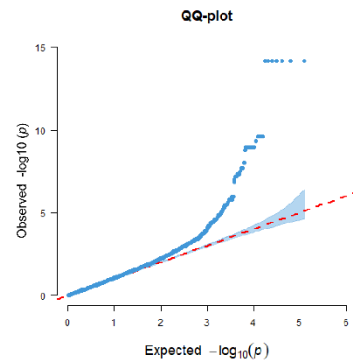

Hippocampus (left)

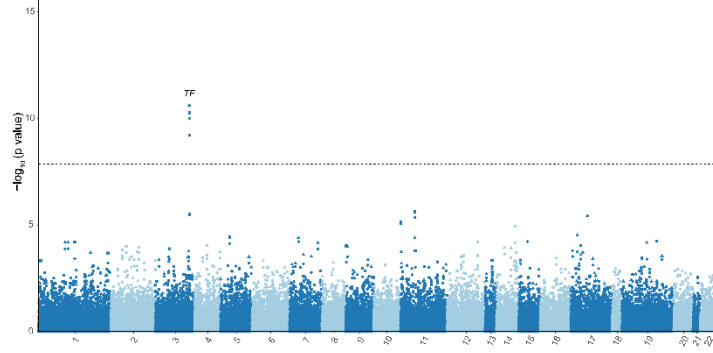

QQ-plot

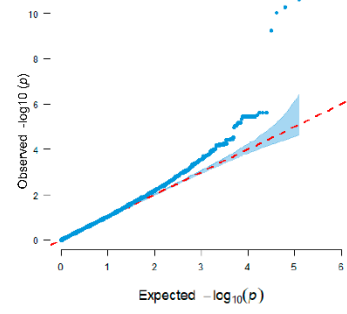

Hippocampus (right)

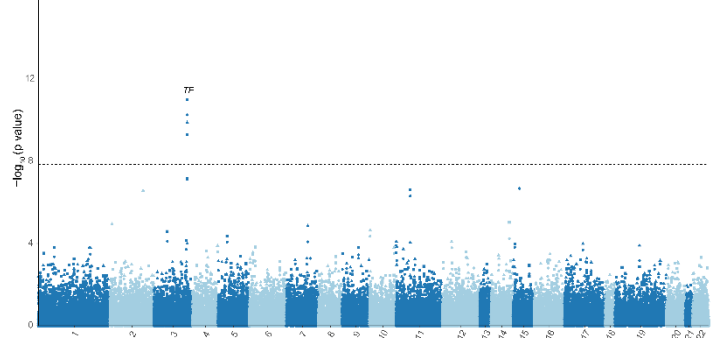

QQ-plot

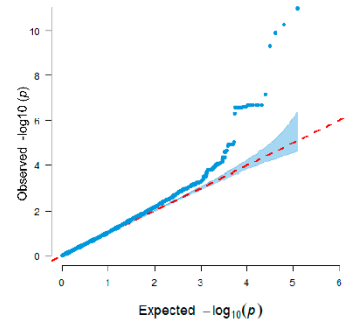

Pallidum (left)

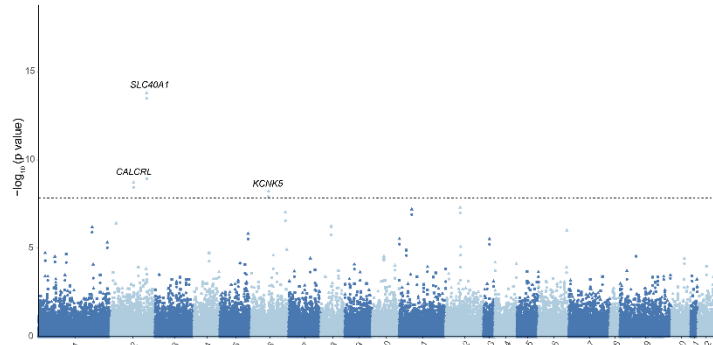

QQ-plot

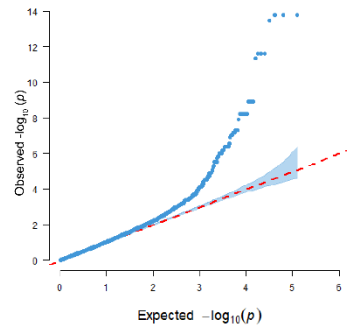

Pallidum (right)

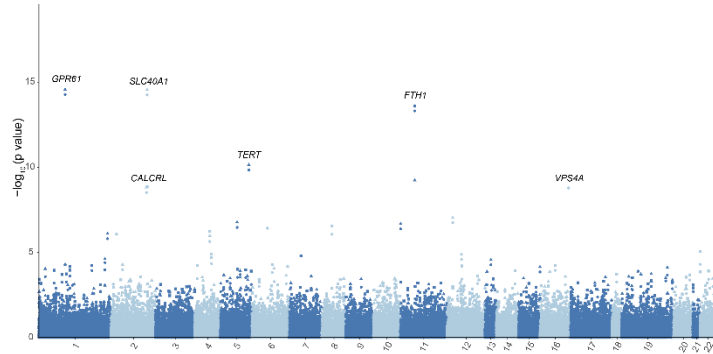

QQ-plot

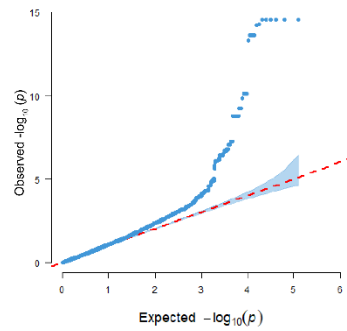

Putamen (left)

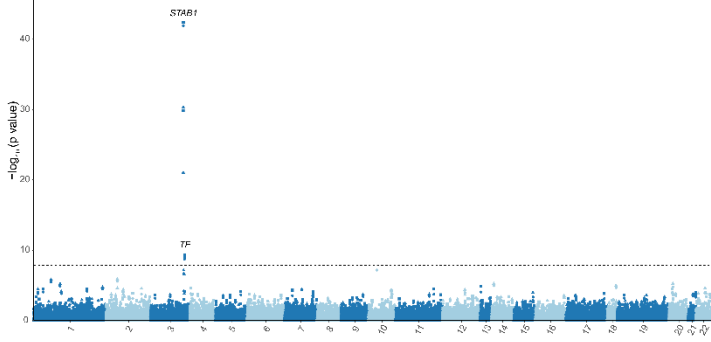

QQ-plot

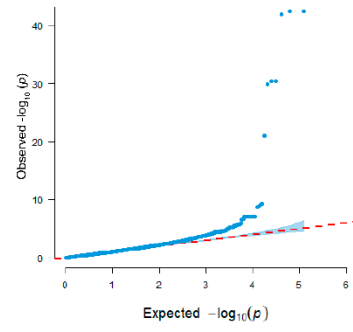

Putamen (right)

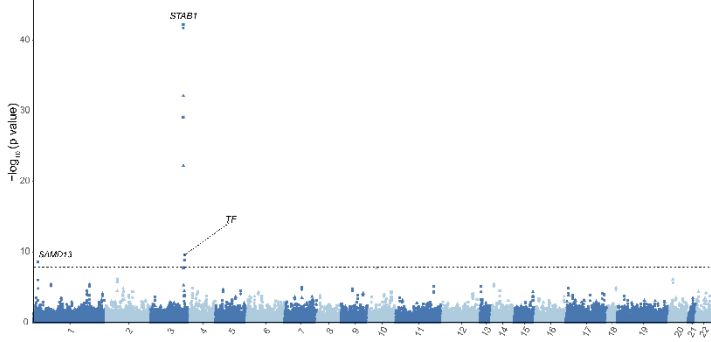

QQ-plot

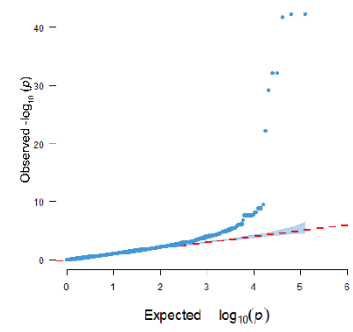

Red nucleus (left)

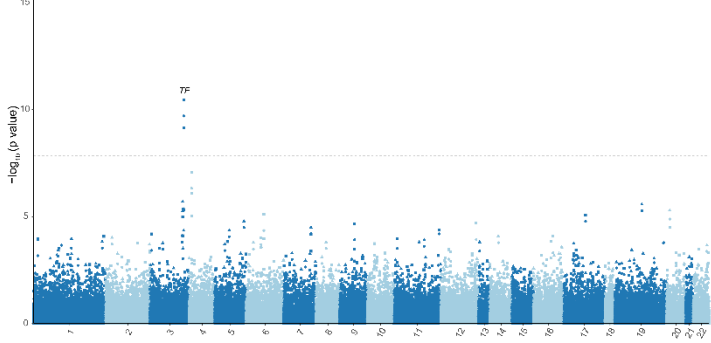

QQ-plot

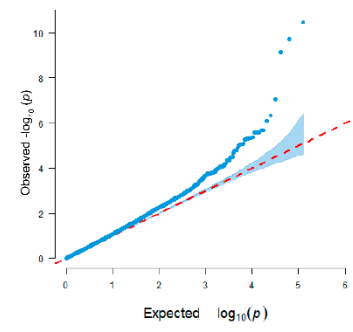

Red nucleus (right)

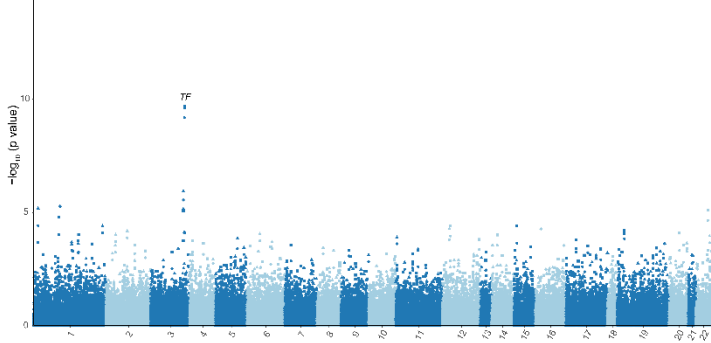

QQ-plot

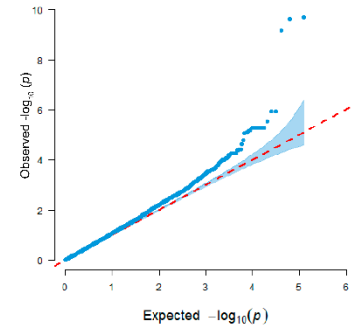

Substantia nigra (left)

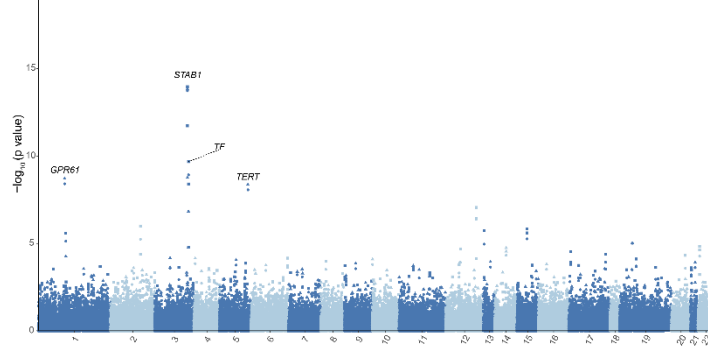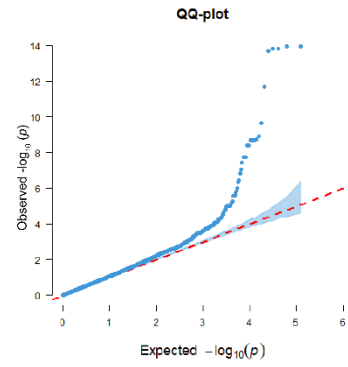

Substantia nigra (right)

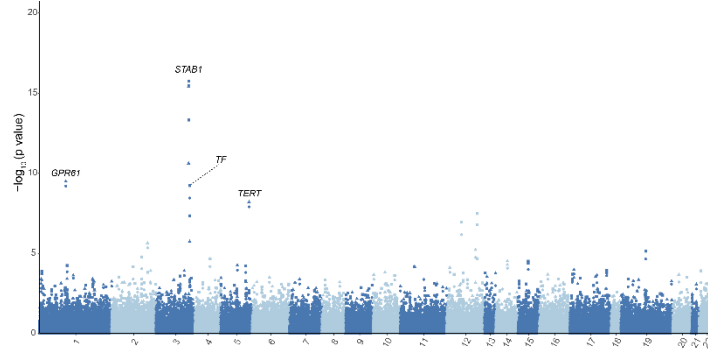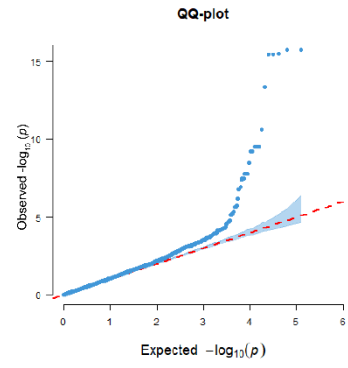

Subthalamic nucleus (left)

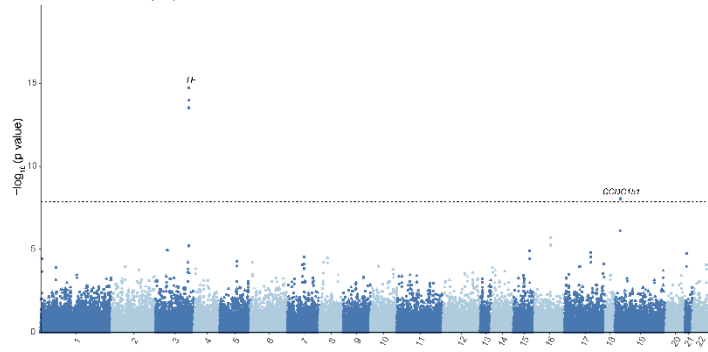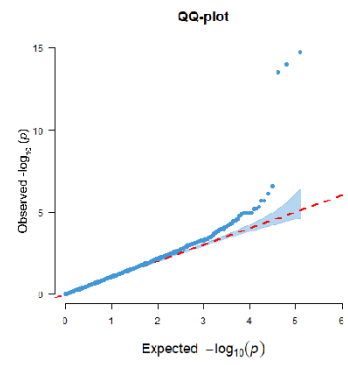

Subthalamic nucleus (right)

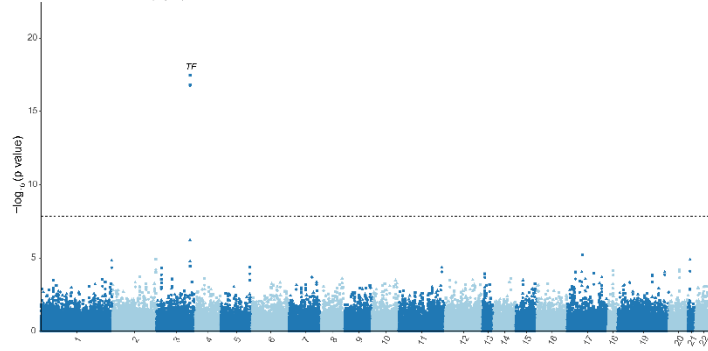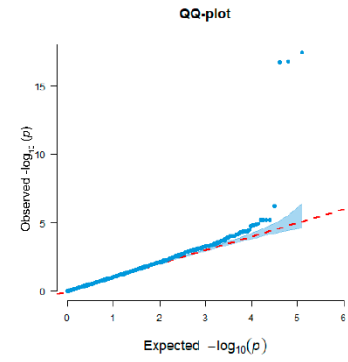

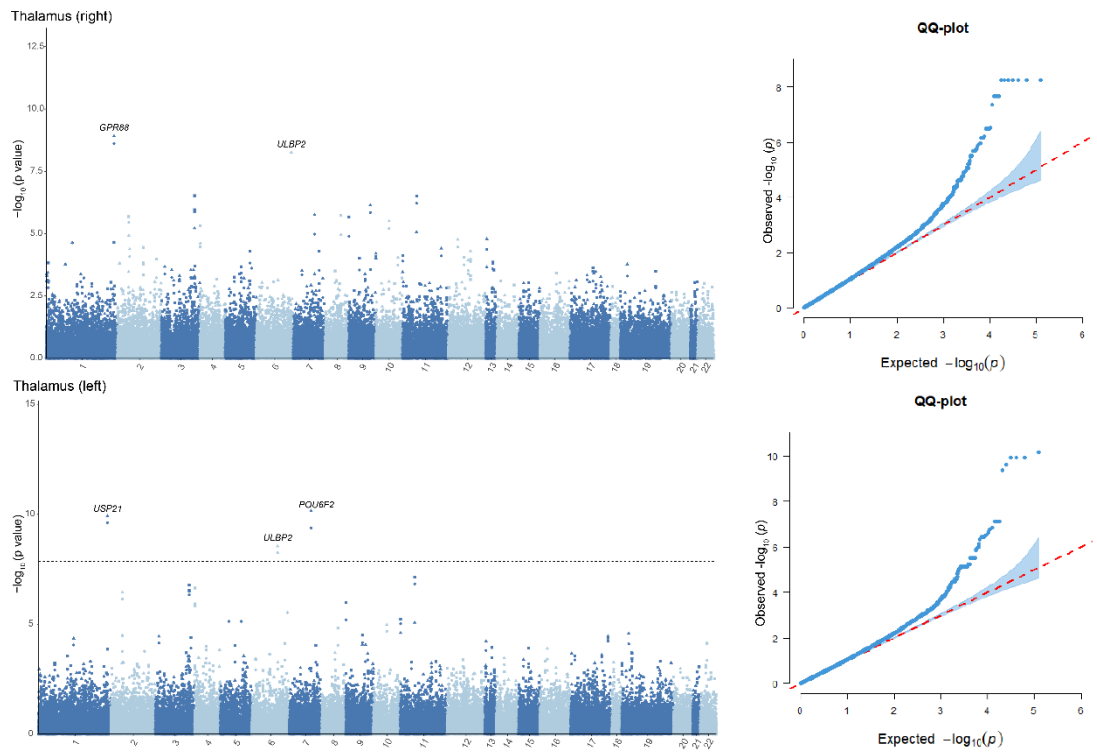

**Supplementary Figure 1.** Manhattan plots of every exome-wide association analysis of rare protein-coding variants performed for QSM in 26 brain regions, in 26789 participants. P values shown are two-sided and Bonferroni correction were used. The dotted horizontal line represents the significance threshold ( $1.7 \times 10^{-8}$ ).

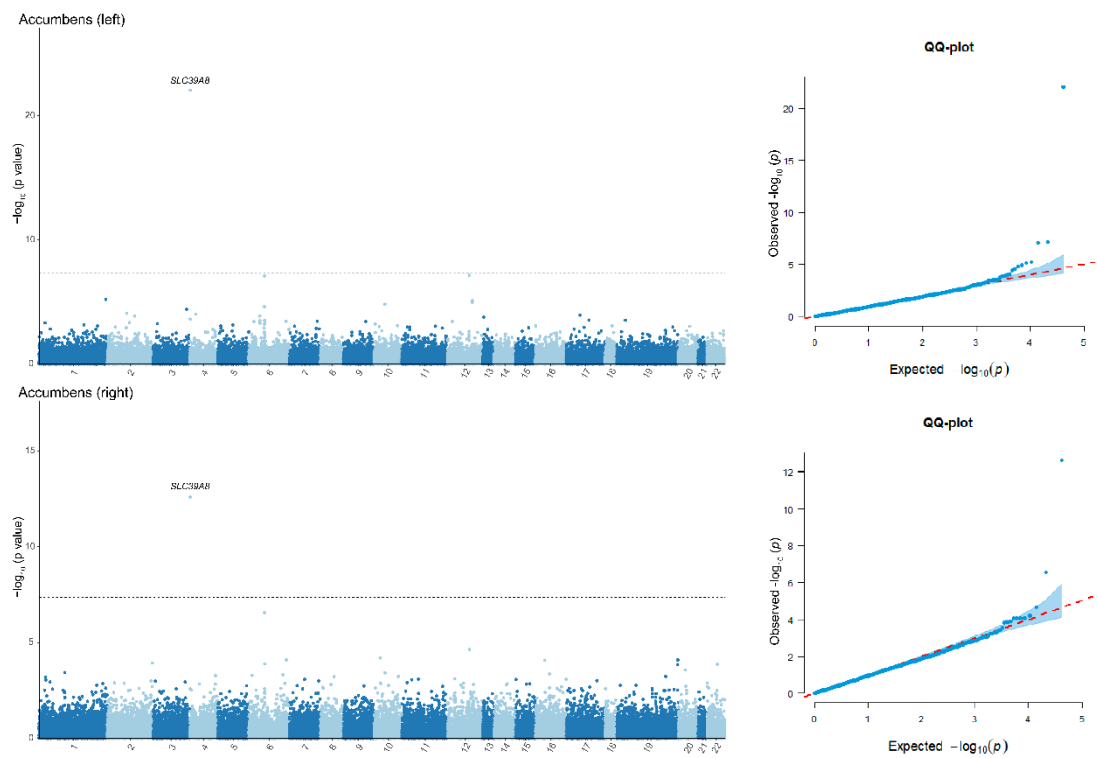

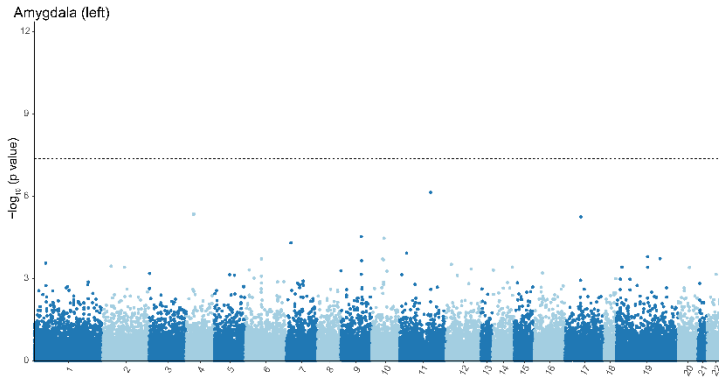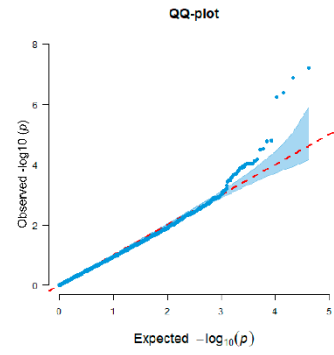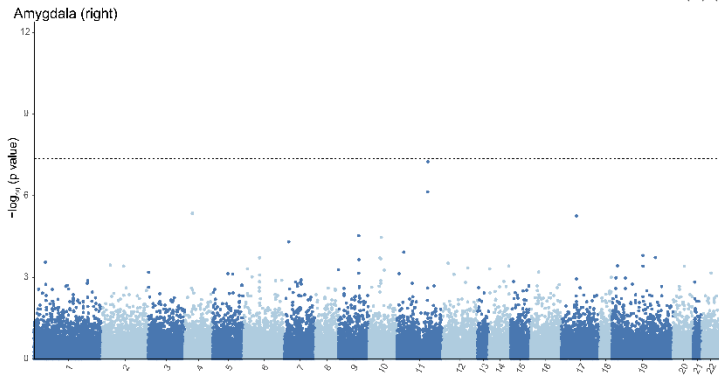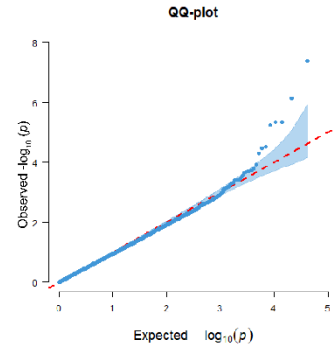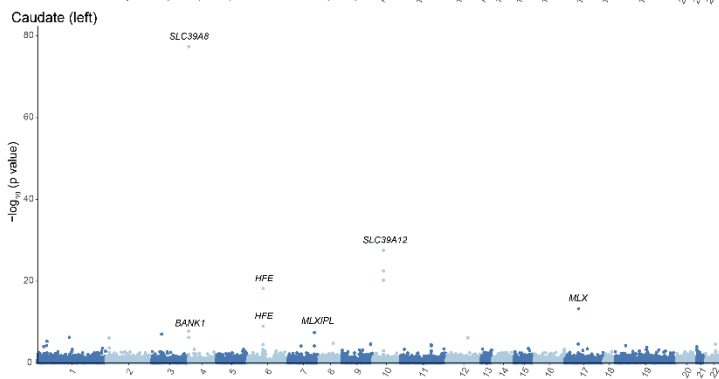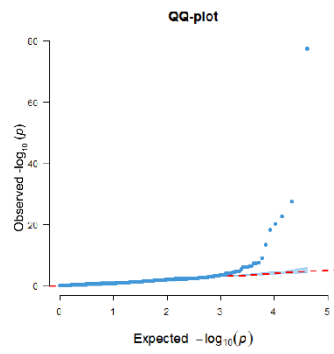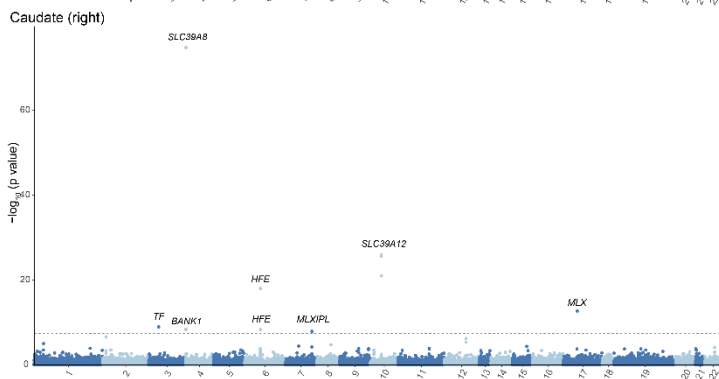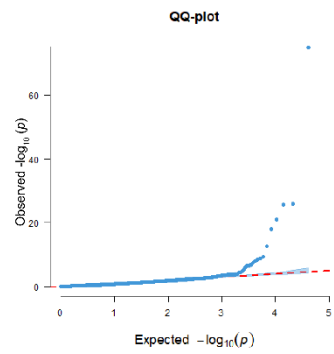



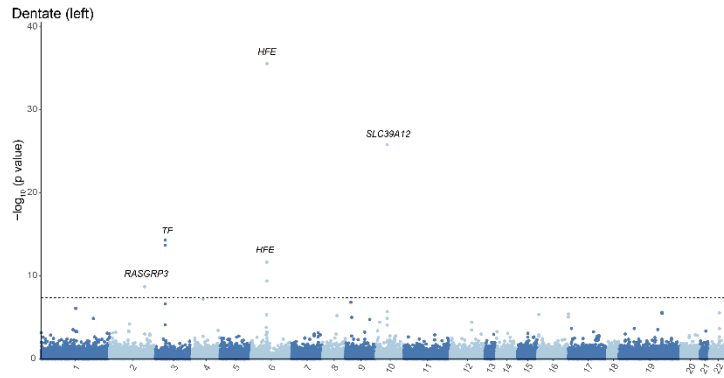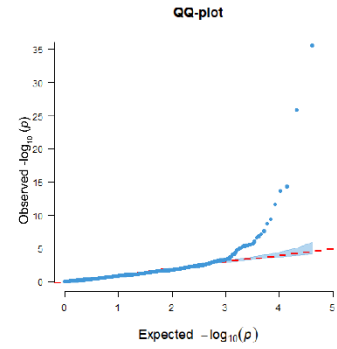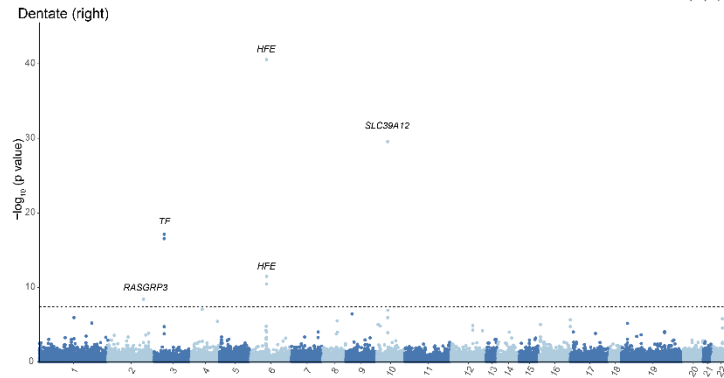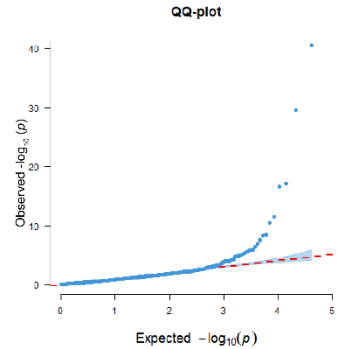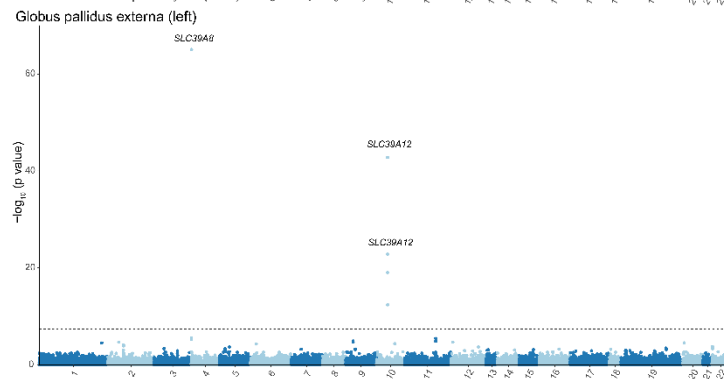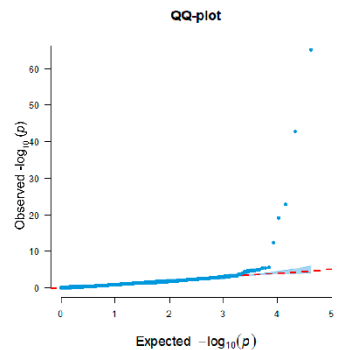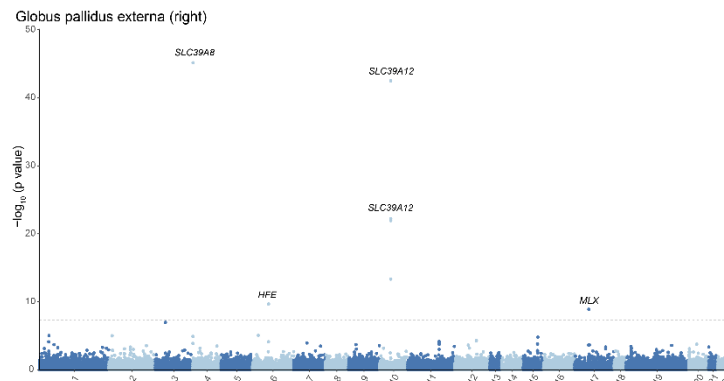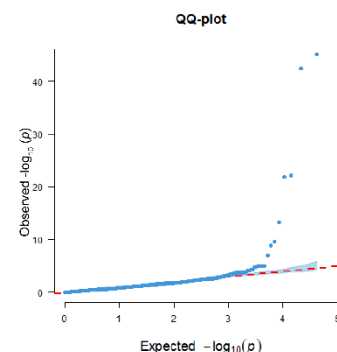

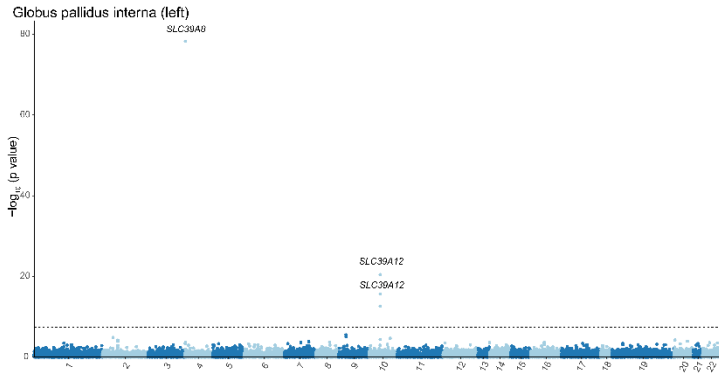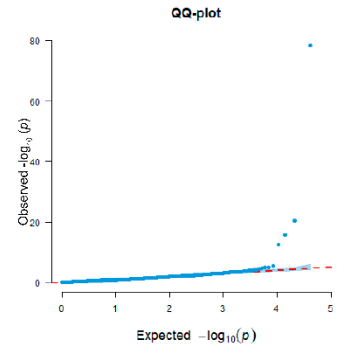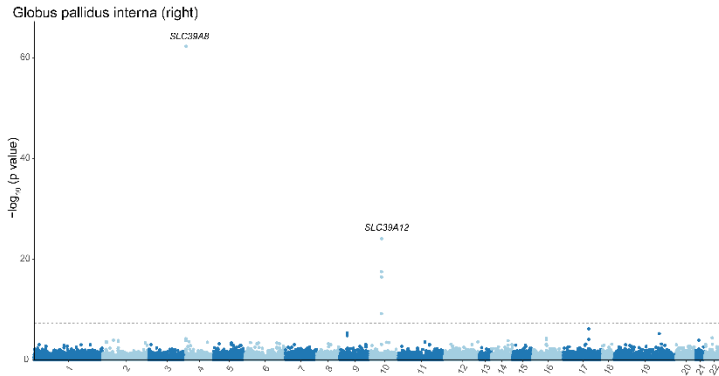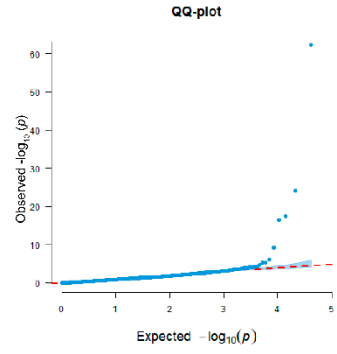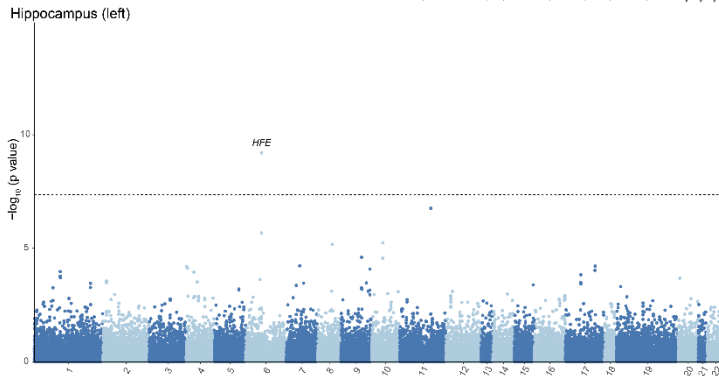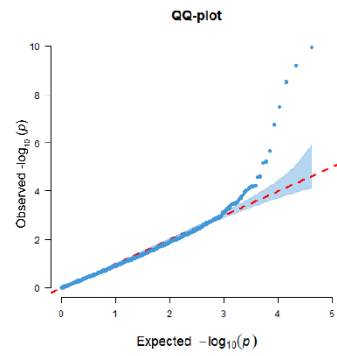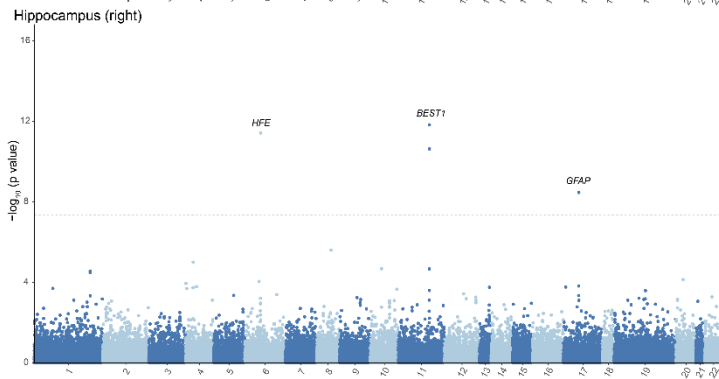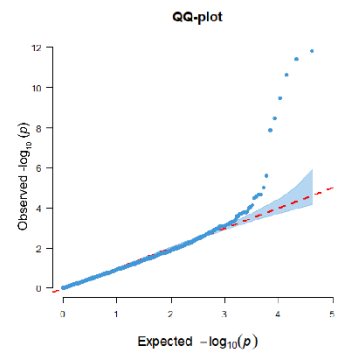

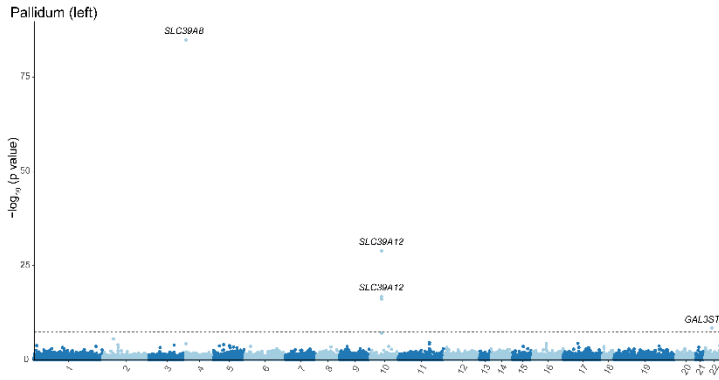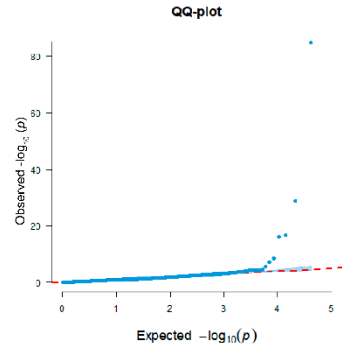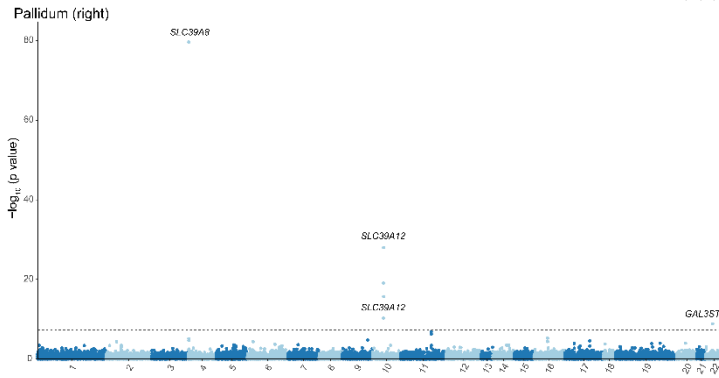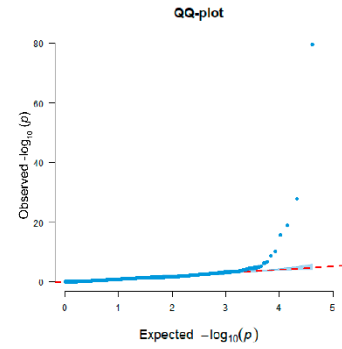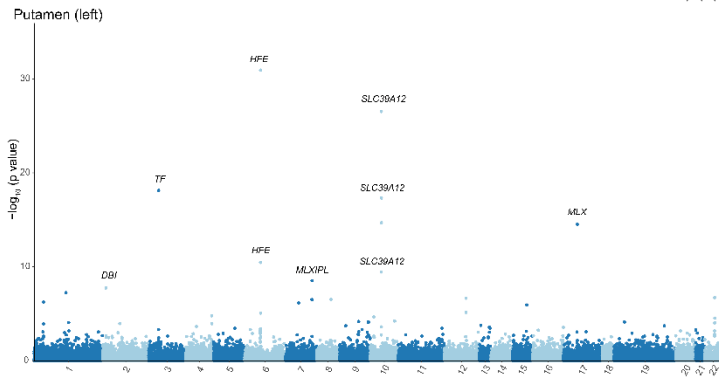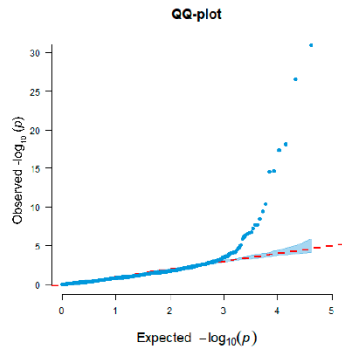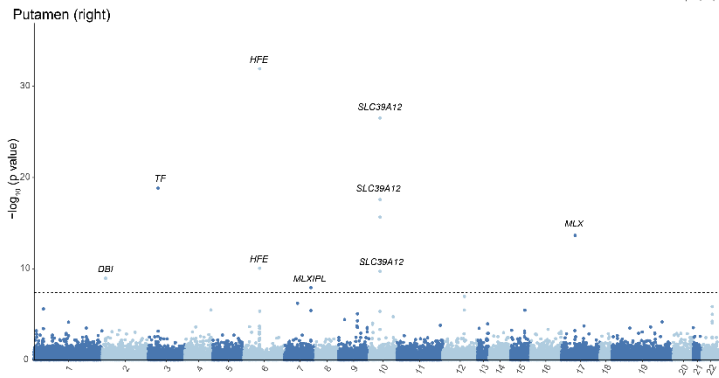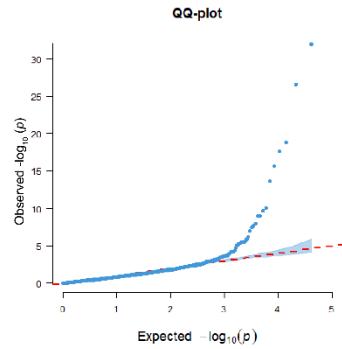

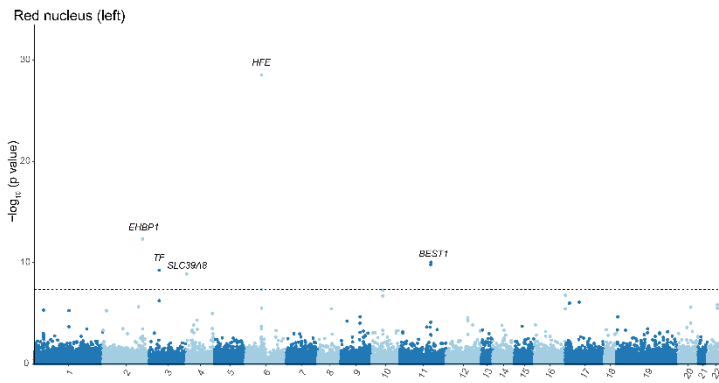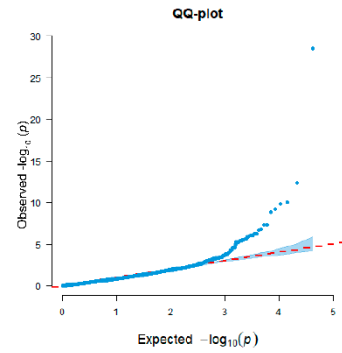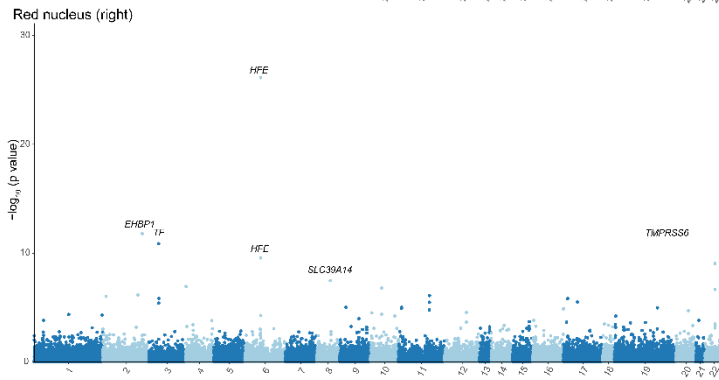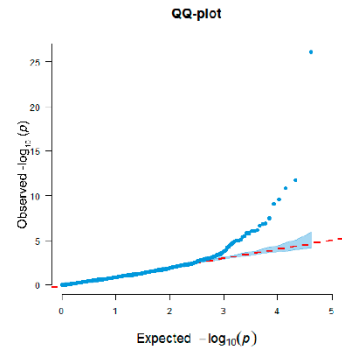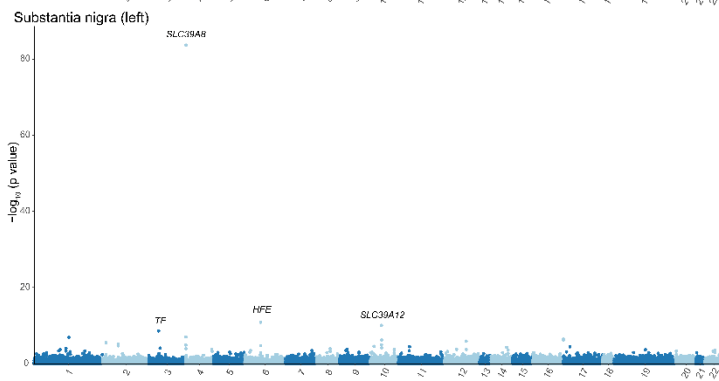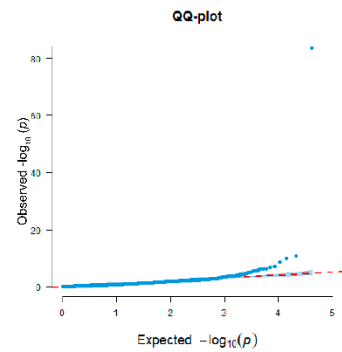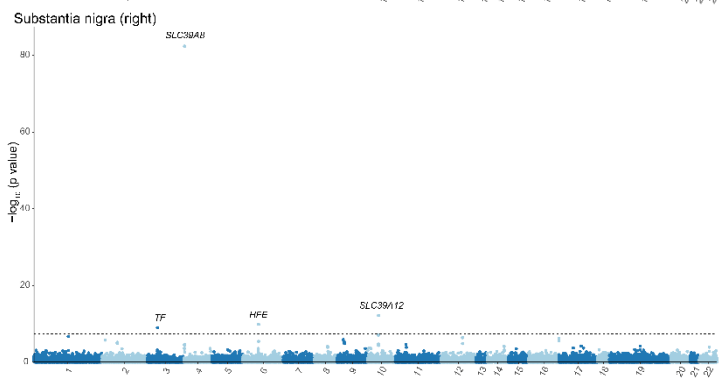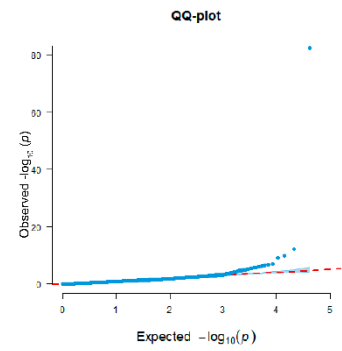

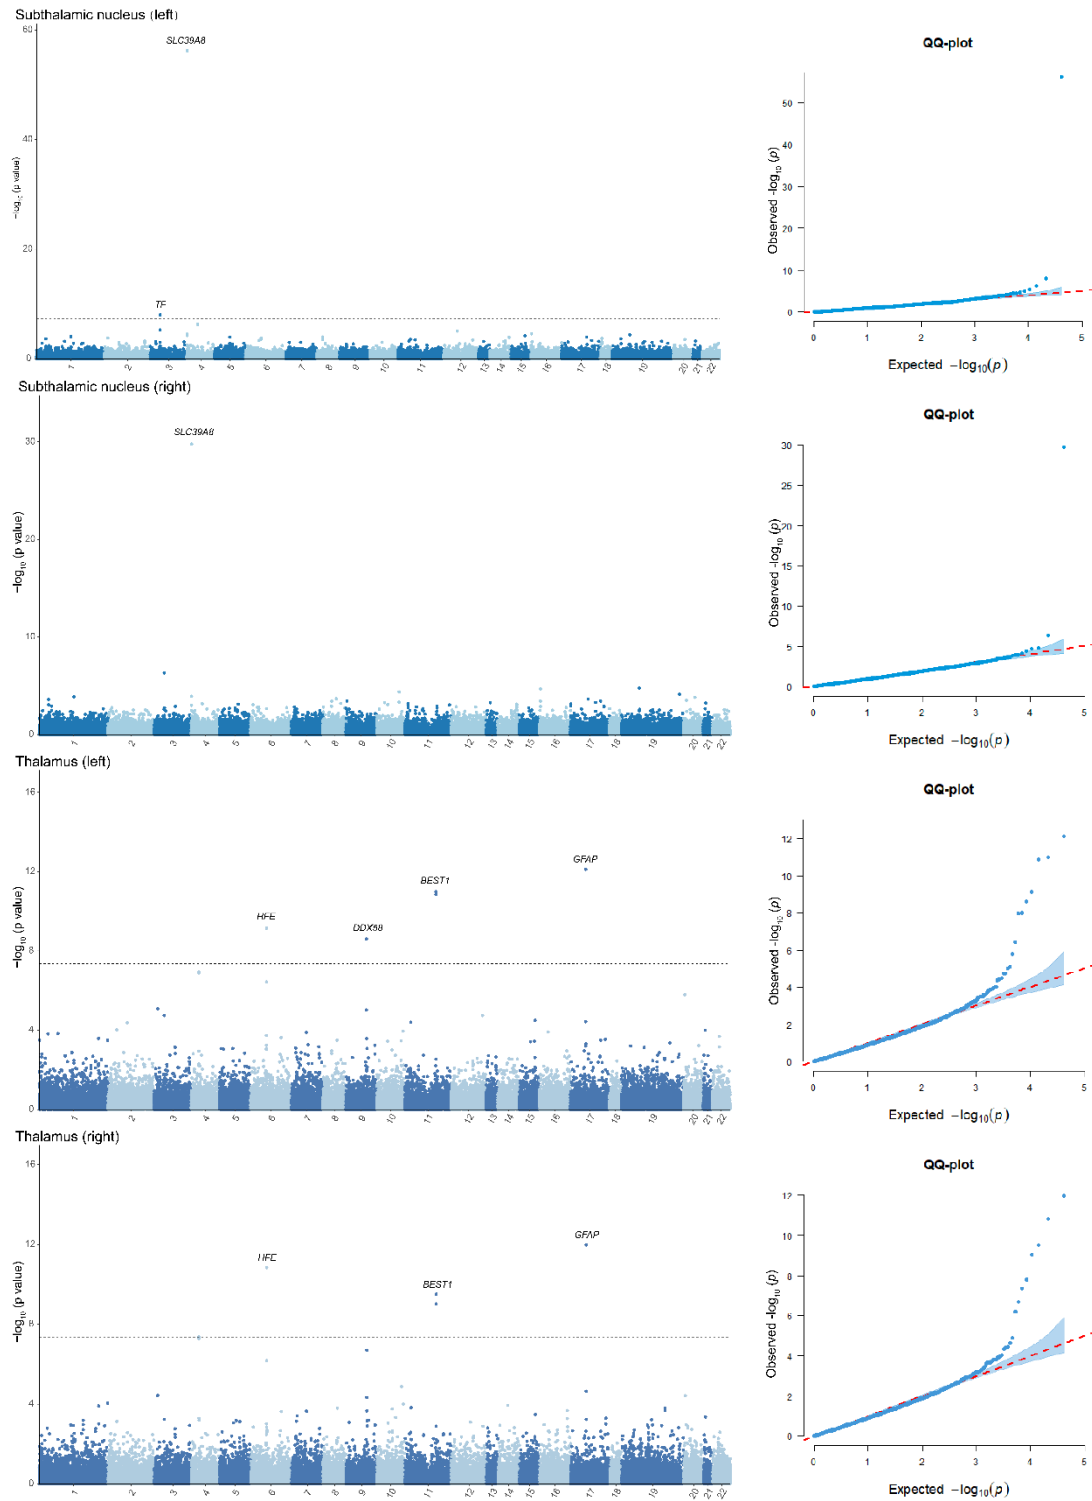

**Supplementary Figure S2.** Manhattan plots of every exome-wide association analysis of common protein-coding variants performed for QSM of 26 brain regions in 26789 participants. P values shown are two-sided and Bonferroni correction were used. The dotted horizontal line represents the significance threshold ( $4.6 \times 10^{-8}$ ).

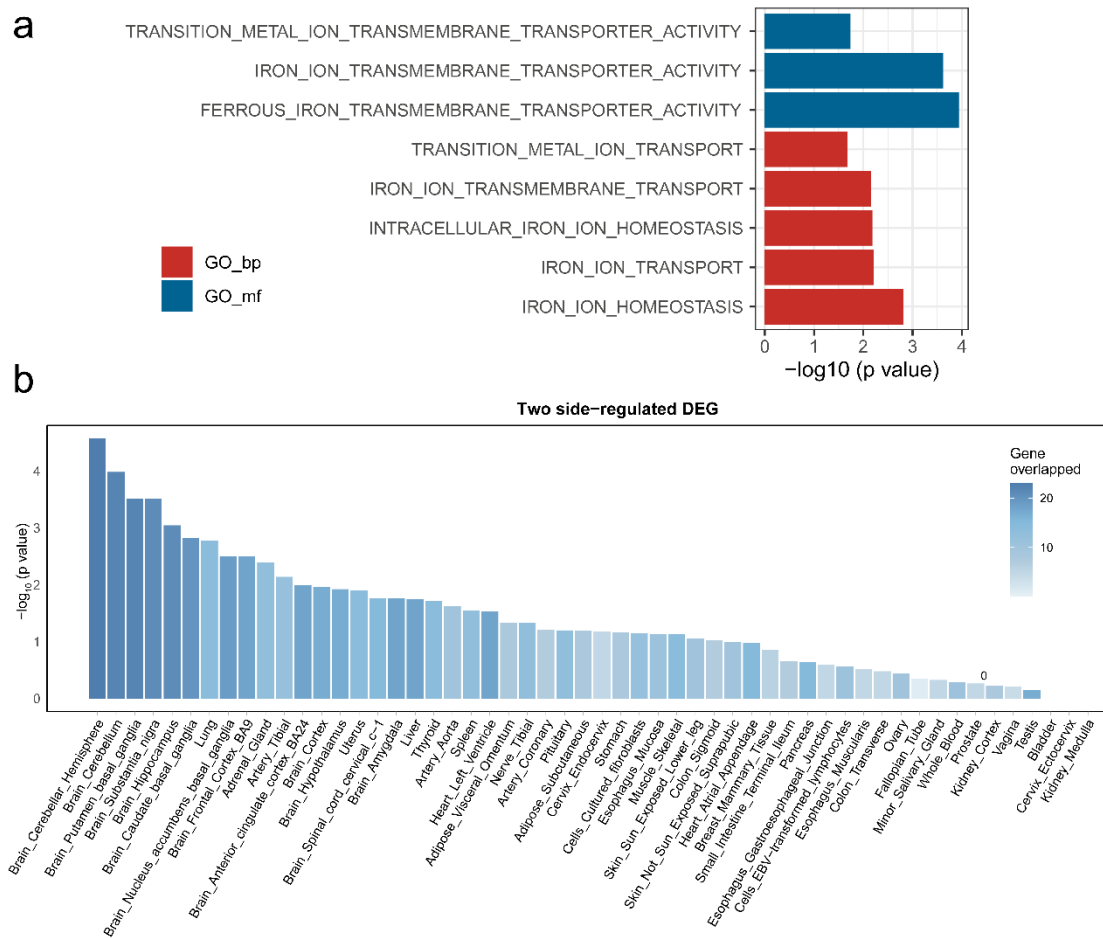

**Supplementary Figure S3. Tissue and pathway enrichment analysis of genes (exclude top 5 genes) with brain iron.** a) Gene set enrichment analysis of significant genes identified in the exome-wide association analysis, using Gene Ontology and KEGG Ontology database. b) Tissue-wide differential expression analysis of significant brain iron-related genes (exclude top 5 significant genes) using GTEx dataset. The p-values reported are two-sided and unadjusted. GOBP, Gene ontology biological process; GOMF, Gene ontology molecular function.
