# Supplementary material for: Whole-exome sequencing identifies protein-coding variants associated with brain iron in 29,828 individuals
Source: PubMed Central journal article supplement (PMC11219919; doi:10.1038/s41467-024-49702-2), 2024-07-02
Supplement: 41467_2024_49702_MOESM2_ESM.pdf [file 41467_2024_49702_MOESM2_ESM.pdf]

## Peer Review File

---

### Whole-Exome Sequencing Identifies Protein-Coding Variants Associated with Brain Iron in 29,828 Individuals

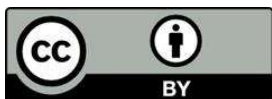

**Open Access** This file is licensed under a Creative Commons Attribution 4.0 International License, which permits use, sharing, adaptation, distribution and reproduction in any medium or format, as long as you give appropriate credit to the original author(s) and the source, provide a link to the Creative Commons license, and indicate if changes were made. In the cases where the authors are anonymous, such as is the case for the reports of anonymous peer reviewers, author attribution should be to 'Anonymous Referee' followed by a clear attribution to the source work. The images or other third party material in this file are included in the article's Creative Commons license, unless indicated otherwise in a credit line to the material. If material is not included in the article's Creative Commons license and your intended use is not permitted by statutory regulation or exceeds the permitted use, you will need to obtain permission directly from the copyright holder. To view a copy of this license, visit <http://creativecommons.org/licenses/by/4.0/>.

**Editorial Note:** This manuscript has been previously reviewed at another journal that is not operating a transparent peer review scheme. This document only contains reviewer comments and rebuttal letters for versions considered at *Nature Communications* .

## **REVIEWERS' COMMENTS**

Reviewer #1 (Remarks to the Author):

The authors have now adequately addressed my concerns.

Reviewer #1 (Remarks on code availability):

Code is a series of shell scripts, README file doesn't contain instructions only a general description (i.e. code for this article). I didn't run the scripts, but they seem to be straightforward.

## Response to the reviewers

The authors sincerely appreciate the critical reviews of the paper. We have now revised the paper to carefully address all the points raised. Our responses below are preceded by "--", and changes made to the paper are shown below within "...", and in red font in the revised paper.

### Reviewer #1:

#### Remarks to the Author:

Code is a series of shell scripts, README file doesn't contain instructions only a general description (i.e. code for this article). I didn't run the scripts, but they seem to be straightforward.

--We updated the code, and provided a detailed README in the Github, as follows:

The code used in the paper Gong et al. "Whole-Exome Sequencing Identifies Protein-Coding Variants Associated with Brain Iron in 29,828 Individuals". The data utilized for these analyses originates from the UK Biobank cohort.

For the operation of this project, the installation of the following software or package is required: SAIGE-GENE+ R package (<https://github.com/saigegit/SAIGE>) TwoSampleMR version 0.5.6 R package ([MRCIEU/TwoSampleMR: R package for performing 2-sample MR using MR-Base database \(github.com\)](https://github.com/MRCIEU/TwoSampleMR)) PLINK v2.0 (<https://www.cog-genomics.org/plink/2.0/>)

The scripts EWAS\_code.sh, Common\_code.sh, and LOVO\_code.sh utilize the SAIGE-GENE+ package for the identification of genetic variants associated with brain iron accumulation. Specifically, EWAS\_code.sh is used for detecting rare variants, Common\_code.sh for common variants, and LOVO\_code.sh is employed to identify the most significant variants driving the observed associations.

The scripts conditional\_code.sh utilize the SAIGE-GENE+ package and PLINK software to assess the interaction of rare and common variants.

The scripts MR\_code\_example.R utilize the TwoSampleMR package to validate 490 the causal relationship and the simulate\_WES\_power.R was used to show the power calculation of the cohorts.
