# Supplementary material for: Whole-exome sequencing identifies protein-coding variants associated with brain iron in 29,828 individuals
Source: PubMed Central journal article supplement (PMC11219919; doi:10.1038/s41467-024-49702-2), 2024-07-02
Supplement: 41467_2024_49702_MOESM3_ESM.pdf [file 41467_2024_49702_MOESM3_ESM.pdf]

## Description of Additional Supplementary Files

**File name: Supplementary Data 1**

Description: Collapse analysis of significant rare variants of regional QSM (discovery)

**File name: Supplementary Data 2**

Description: Collapse analysis of rare variants of regional QSM (replication cohort)

**File name: Supplementary Data 3**

Description: Power calculation of cohorts

**File name: Supplementary Data 4**

Description: Single variants information and LOVO results for variants from significant Gene-regional QSM associations

**File name: Supplementary Data 5**

Description: Gene-regional QSM associations conditioned on nearby associated common variants

**File name: Supplement Data 6**

Description: Collapse analysis of rare variants of regional QSM in different sex.

**File name: Supplementary Data 7**

Description: Collapse analysis of significant common variants of regional QSM (discovery)

**File name: Supplementary Data 8**

Description: Genes mapped to common variants that associated regional QSM in replication study

**File name: Supplementary Data 9**

Description: Identified gene for brain iron that have previously been reported in GWAS of any traits listed in the GWAS catalog.

**File name: Supplementary Data 10**

Description: Gene set enrichment analysis of significant genes using Gene Ontology and KEGG Ontology database

**File name: Supplementary Data 11**

Description: Protein-protein interaction network of significant QSM genes

**File name: Supplementary Data 12**

Description: Tissue-wide differential expression analysis of significant QSM genes using GTEx dataset

**File name: Supplementary Data 13**

Description: Tissue-wide differential expression analysis of significant QSM genes (exclude top 5 genes) using GTEx dataset

**File name: Supplementary Data 14**

Description: Gene set enrichment analysis of significant genes (exclude top 5 genes) using Gene Ontology and KEGG Ontology database

**File name: Supplementary Data 15**

Description: Causal relationships identified by Mendelian randomization analysis.

**File name: Supplementary Data 16**

Description: Causal relationships identified by Mendelian randomization analysis

using other methods.

**File name: Supplementary Data 17**

Description: Inverse causal relationships identified by Mendelian randomization analysis.

**File name: Supplementary Data 18**

Description: Inverse causal relationships identified by Mendelian randomization analysis using other methods.

**File name: Supplementary Data 19**

Description: Causal relationships identified by multivariate Mendelian randomization analysis.

**File name: Supplementary Data 20**

Description: Field ID and description for regional QSM in the UK Biobank.
